# Supplementary material for: DNA double-strand break repair pathway regulates PD-L1 expression in cancer cells
Source: PubMed Central journal article supplement (PMC5701012; doi:10.1038/s41467-017-01883-9), 2017-11-24
Supplement: 41467_2017_1883_MOESM1_ESM.pdf [file 41467_2017_1883_MOESM1_ESM.pdf]

# Supplementary Figure 1

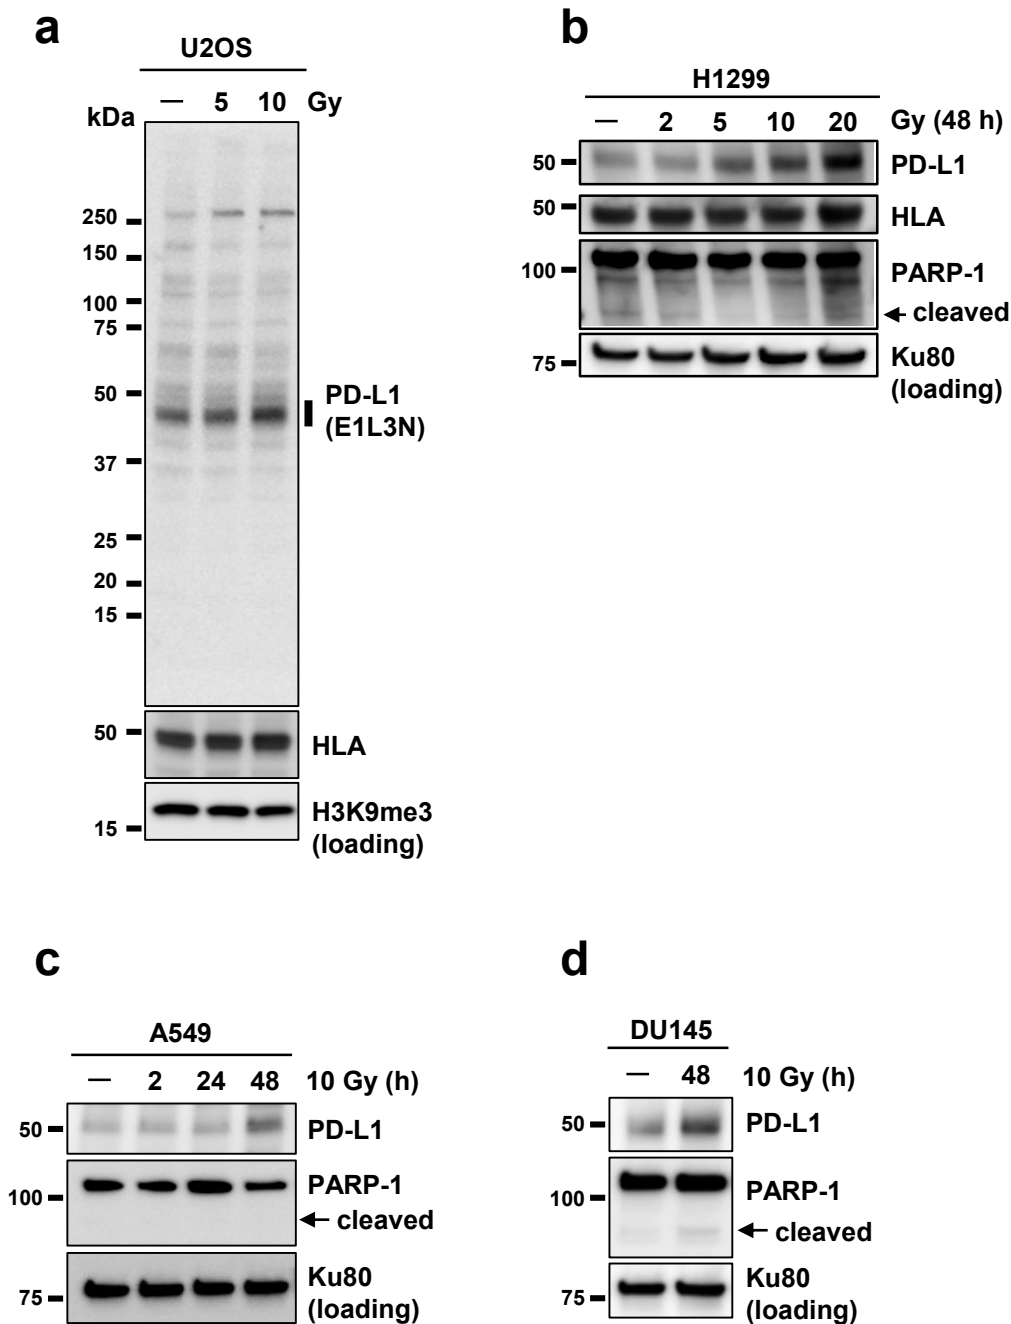

## Supplementary Figure 1. PD-L1 expression is induced in response to DNA damage

a) Full-membrane blotting of PD-L1 is shown. U2OS cells were harvested 48 h after IR. HLA level was not significantly altered at 48 h after IR.

b-d) Upregulation of PD-L1 was similarly observed in the H1299 (b), A549 (c), and DU145 (d) cells after IR.

# Supplementary Figure 2

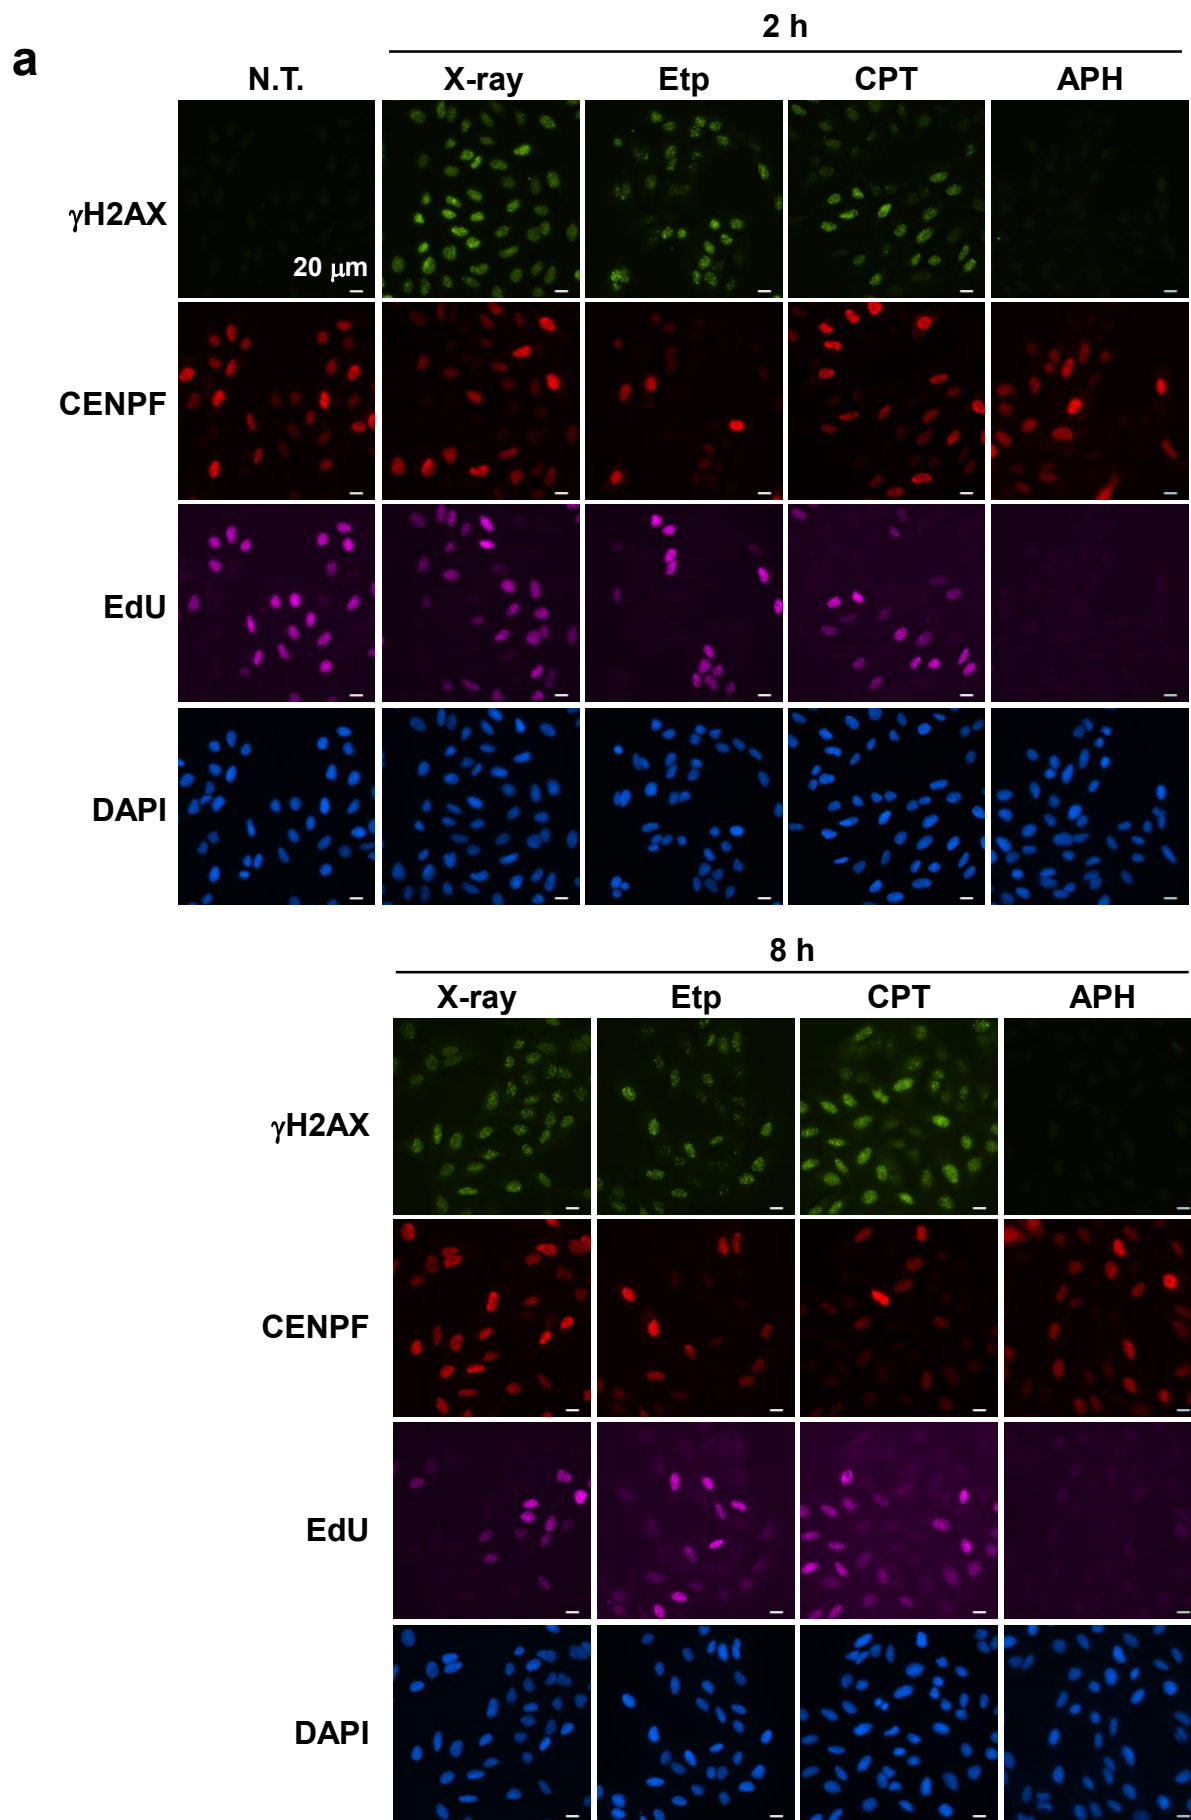

# Supplementary Figure 2

**b**

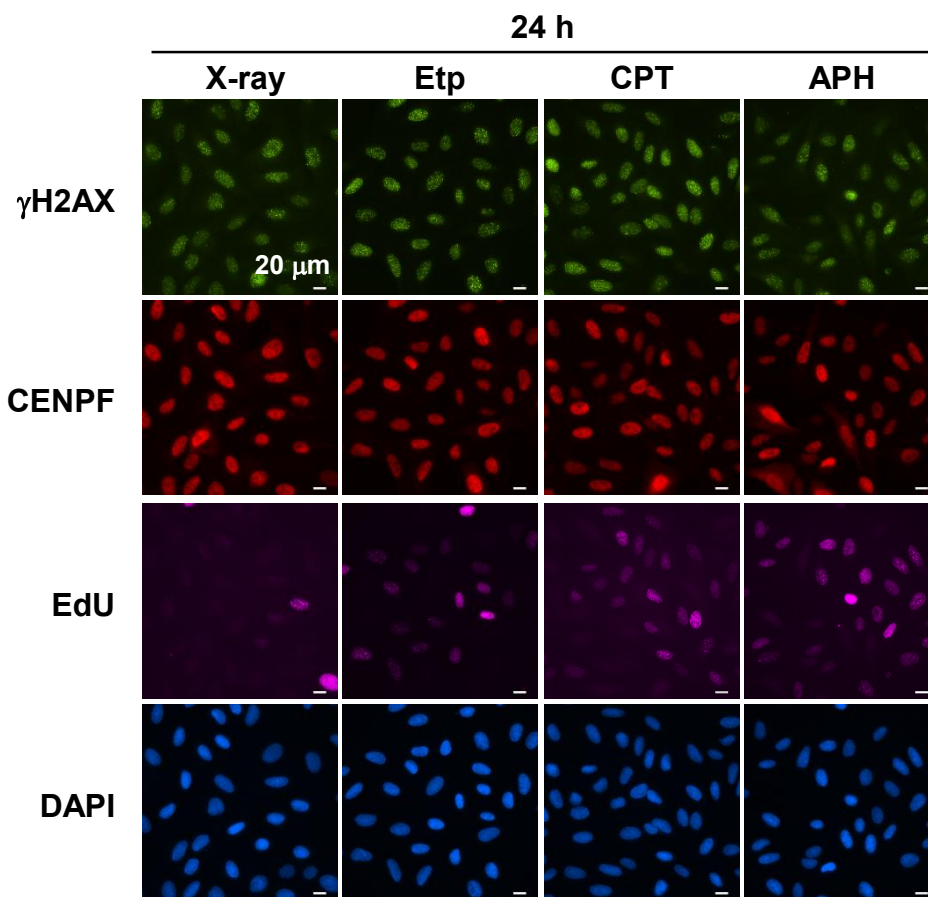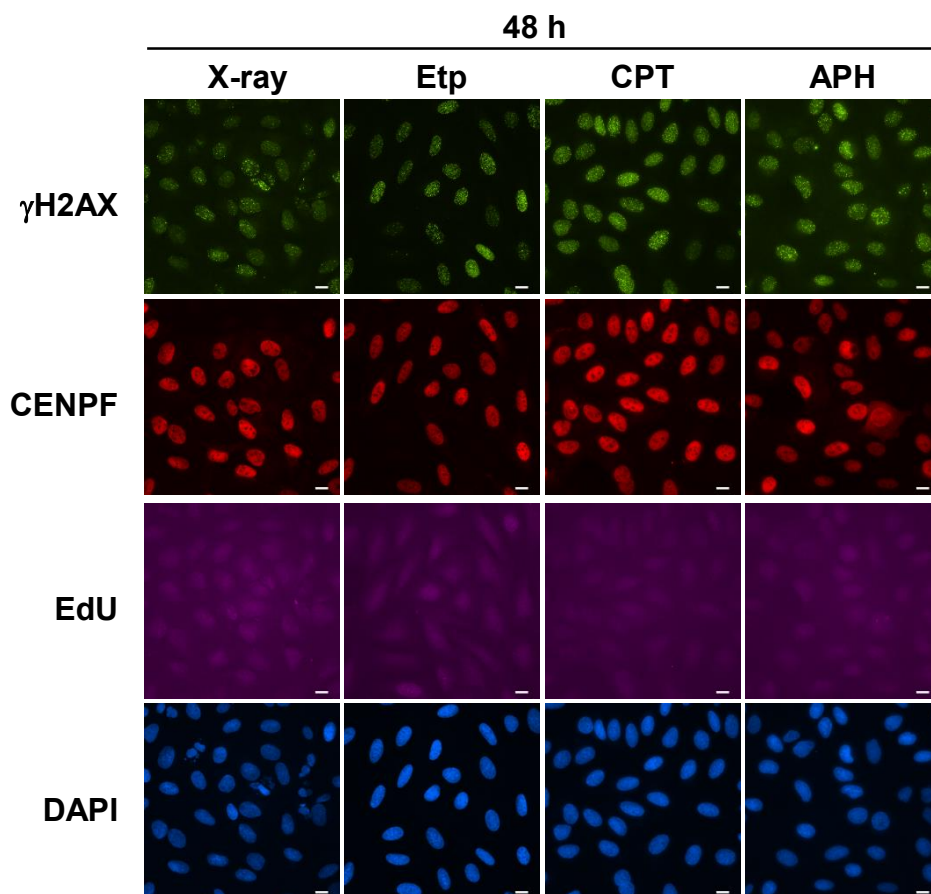

# Supplementary Figure 2

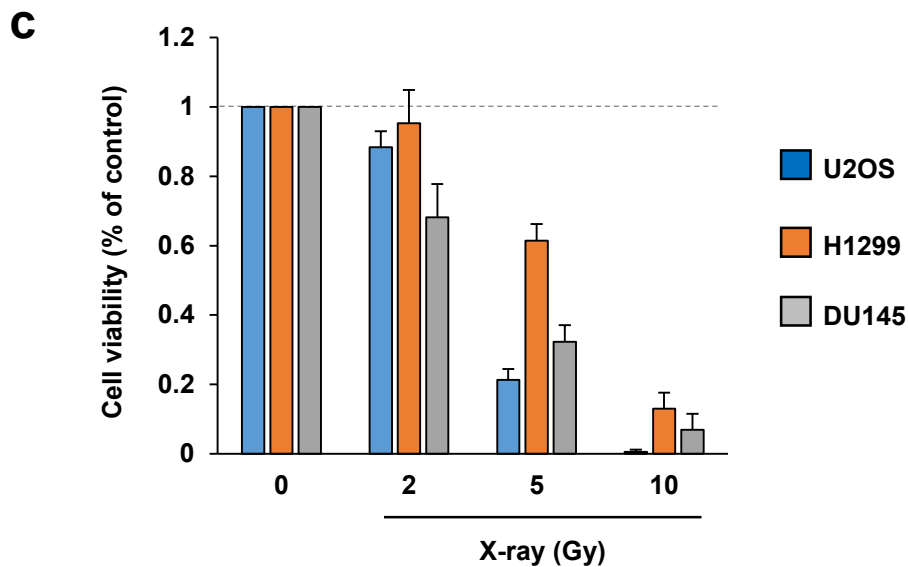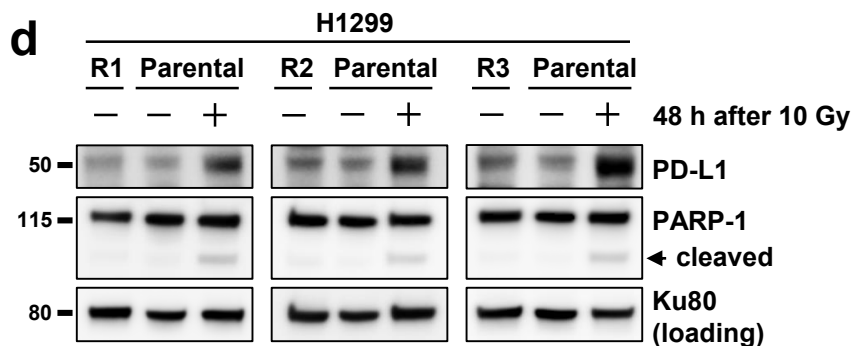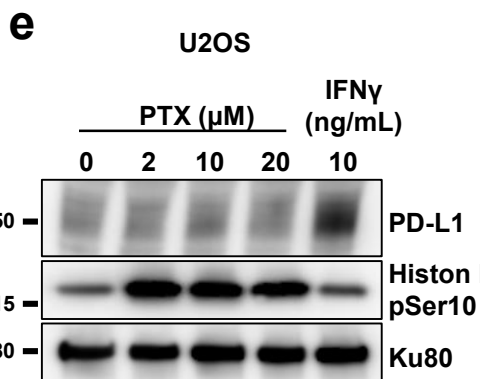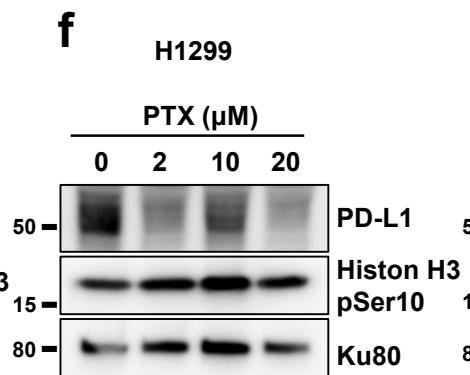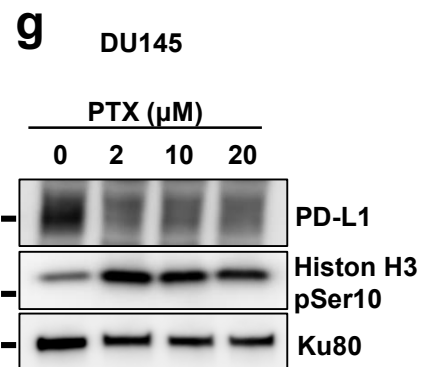

## **Supplementary Figure 2. Analysis of DNA damage and cell viability after DNA damage**

a, b) U2OS cells were irradiated at 10 Gy X-ray or were treated with 500 nM Etp, 50 nM CPT and 500 nM APH. Cells were fixed at indicated time point and stained with  $\gamma$ H2AX, CENPF, EdU and DAPI. To identify S phase cells, EdU was added prior to DNA damage. In addition, to identify G2 cells, cells were stained with CENPF. EdU+/CENPF+ cells are in the S phase, and EdU-/CENPF+ cells are in the G2 phase. The scale bar represents 20  $\mu$ m.

c) Colony formation assay was performed in U2OS, H1299 and DU145 cells after IR. Cells were fixed at 14 days after IR.

d) The IR-induced PD-L1 upregulation were not maintained in surviving cells. H1299 cells were irradiated with 10 Gy. Following the incubation for >14 days after IR, an individual colony (R1, R2 and R3) was picked up. R1–R3 cells were harvested and PD-L1 expression levels were examined. Un-irradiated H1299 cells and 10 Gy-irradiated H1299 cells (48 h) were used as a control. Hence, as shown by the colony assay, the majority of 10 Gy irradiated cells eventually die or stop growing within ~14 days. However notably, the PD-L1 expression levels return back to normal in surviving cells.

e-g) PD-L1 expression was examined in U2OS (e), H1299 (f) or DU145 (g) cells at 48 h after paclitaxel (PTX) treatment. The accumulation of mitotic cells by PTX was confirmed by histone H3 pSer10, a marker of mitosis.

Error bars represent the s.d. of three independent experiments (e).

# Supplementary Figure 3

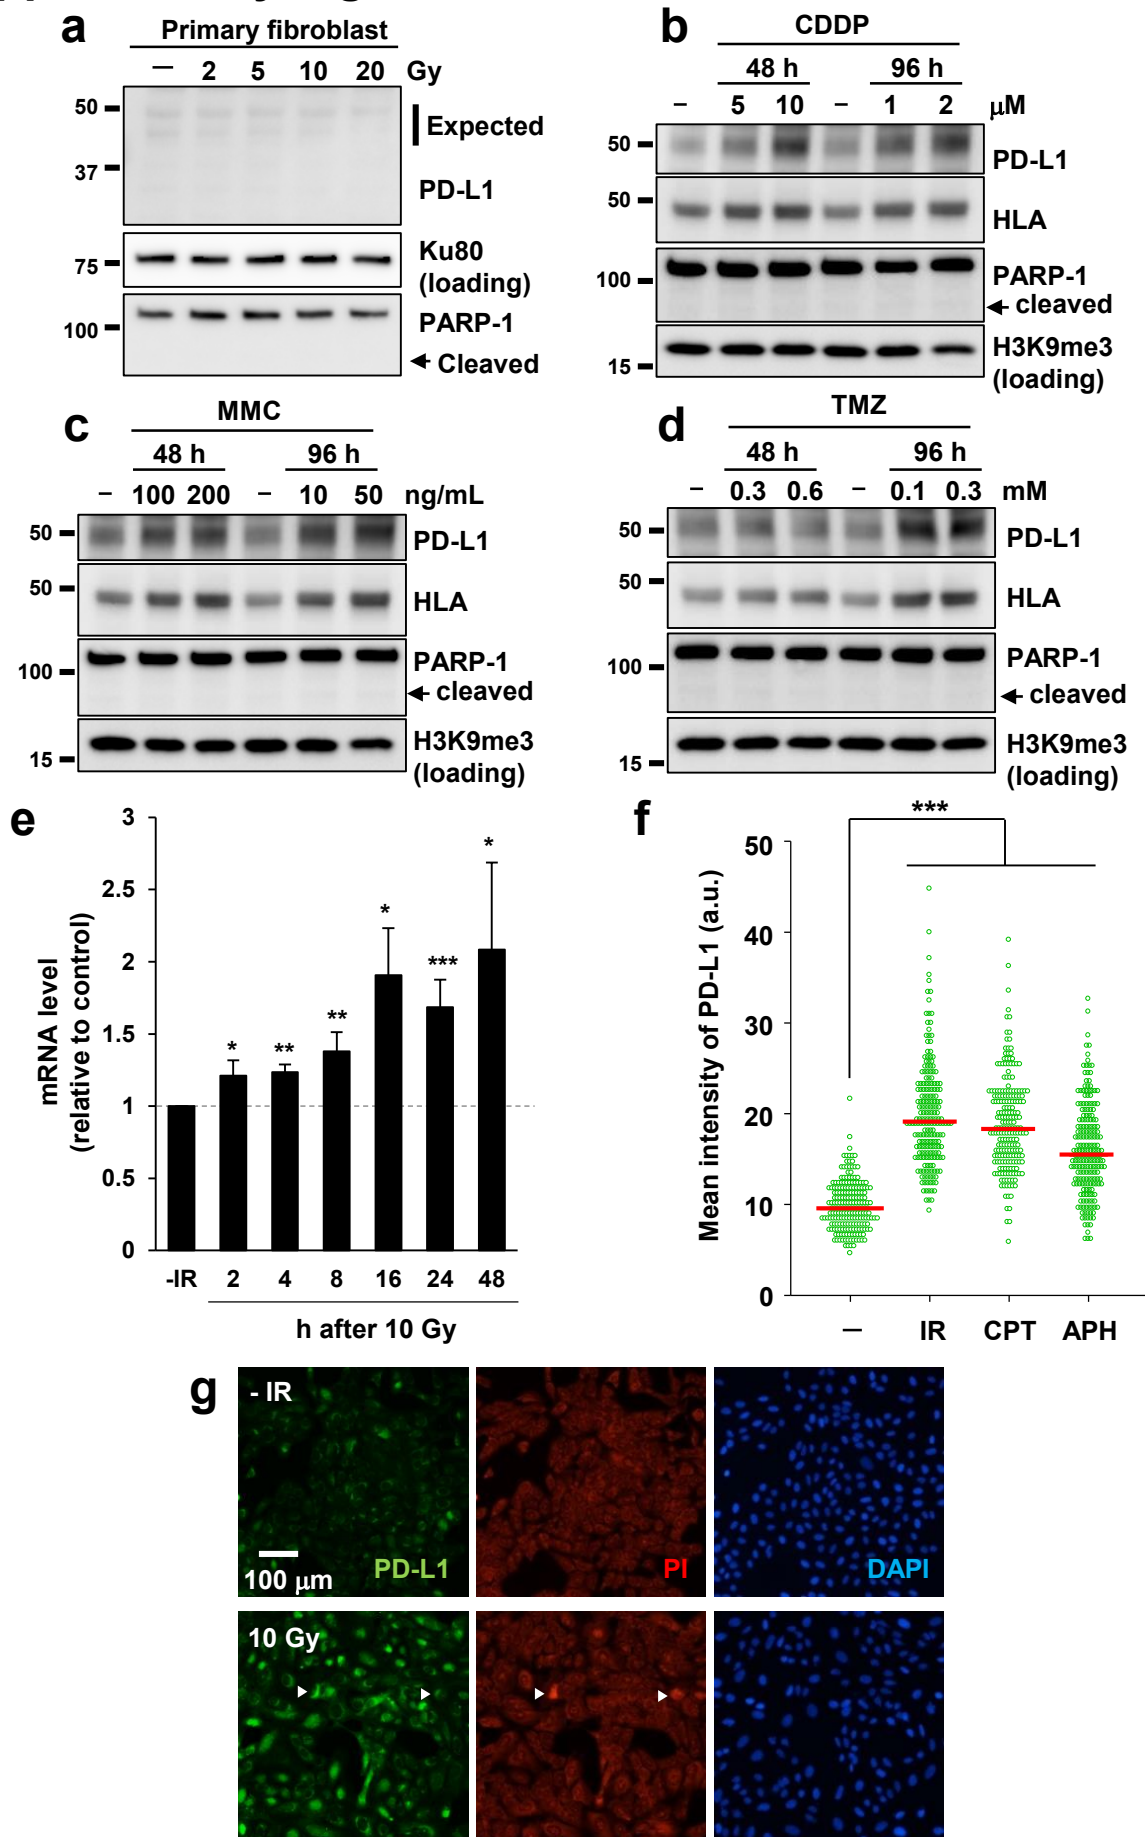

### **Supplementary Figure 3. Examination of PD-L1 expression after DNA damage**

a) IR does not effectively upregulate PD-L1 in human primary fibroblast cells. 48BR (WT) primary fibroblast cells were harvested 48 h after IR. The expression might be distinctively regulated between cell lines. Thus, PD-L1 expression after DNA damage in other normal cell line or organs will be investigated in the future.

b-d) Treatment with chemotherapeutic drugs, which induce DNA damage, upregulates PD-L1. U2OS cells were treated with cisplatin (CDDP: DNA cross-linking agent), mitomycin C (MMC: DNA cross-linking agent) or temozolomide (TMZ: alkylating agent). Cells were harvested at the indicated time points.

e) PD-L1 mRNA levels at 2–48 h after 10 Gy were measured by qPCR. Statistical significance was examined compared with non-treated cells.

f, g) Cell-surface PD-L1 in irradiated U2OS cells was examined by immunofluorescence without permeabilisation. Mean intensity of PD-L1 per cell, except for the DAPI-positive area, was measured by ImageJ 1.48v. Dead cells identified by PI (white arrowheads) were excluded from the analysis. A representative image is shown in panel g. Similar results were obtained in more than two independent experiments.

Error bars represent the s.d. of three independent experiments (e).

# Supplementary Figure 4

**a**

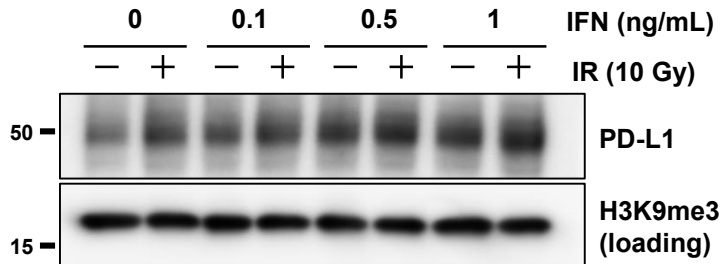

**b**

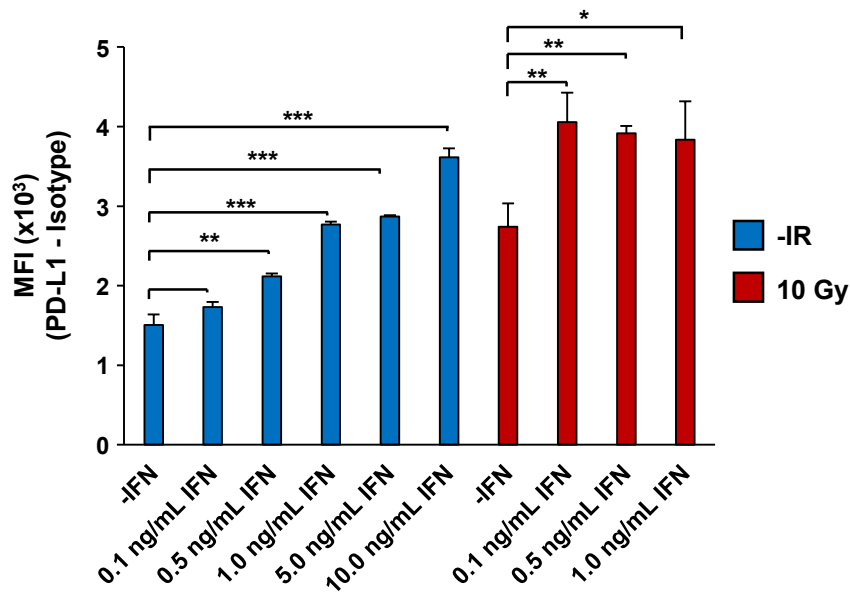

## Supplementary Figure 4. Analysis of IR-induced PD-L1 upregulation in the presence of IFN $\gamma$

a) IR induces an additive PD-L1 upregulation in the presence of IFN $\gamma$ . An indicated amount of IFN $\gamma$  was added 30 min prior to IR. U2OS cells were harvested 48 h after irradiation at 10 Gy.

b) IR induced PD-L1 expression +/- IFN $\gamma$  treatment; it was examined by FACS. U2OS cells were harvested 48 h after 10 Gy +/- IFN $\gamma$ . U2OS cells treated with IFN $\gamma$  alone were harvested 24 h after the treatment. In this experiment, we did not observe a synergistic PD-L1 upregulation by IR in the presence of IFN $\gamma$ . However, it might be caused in other cell lines or *in vivo*.

Error bars represent the s.d. of three independent experiments (b).



# Supplementary Figure 5

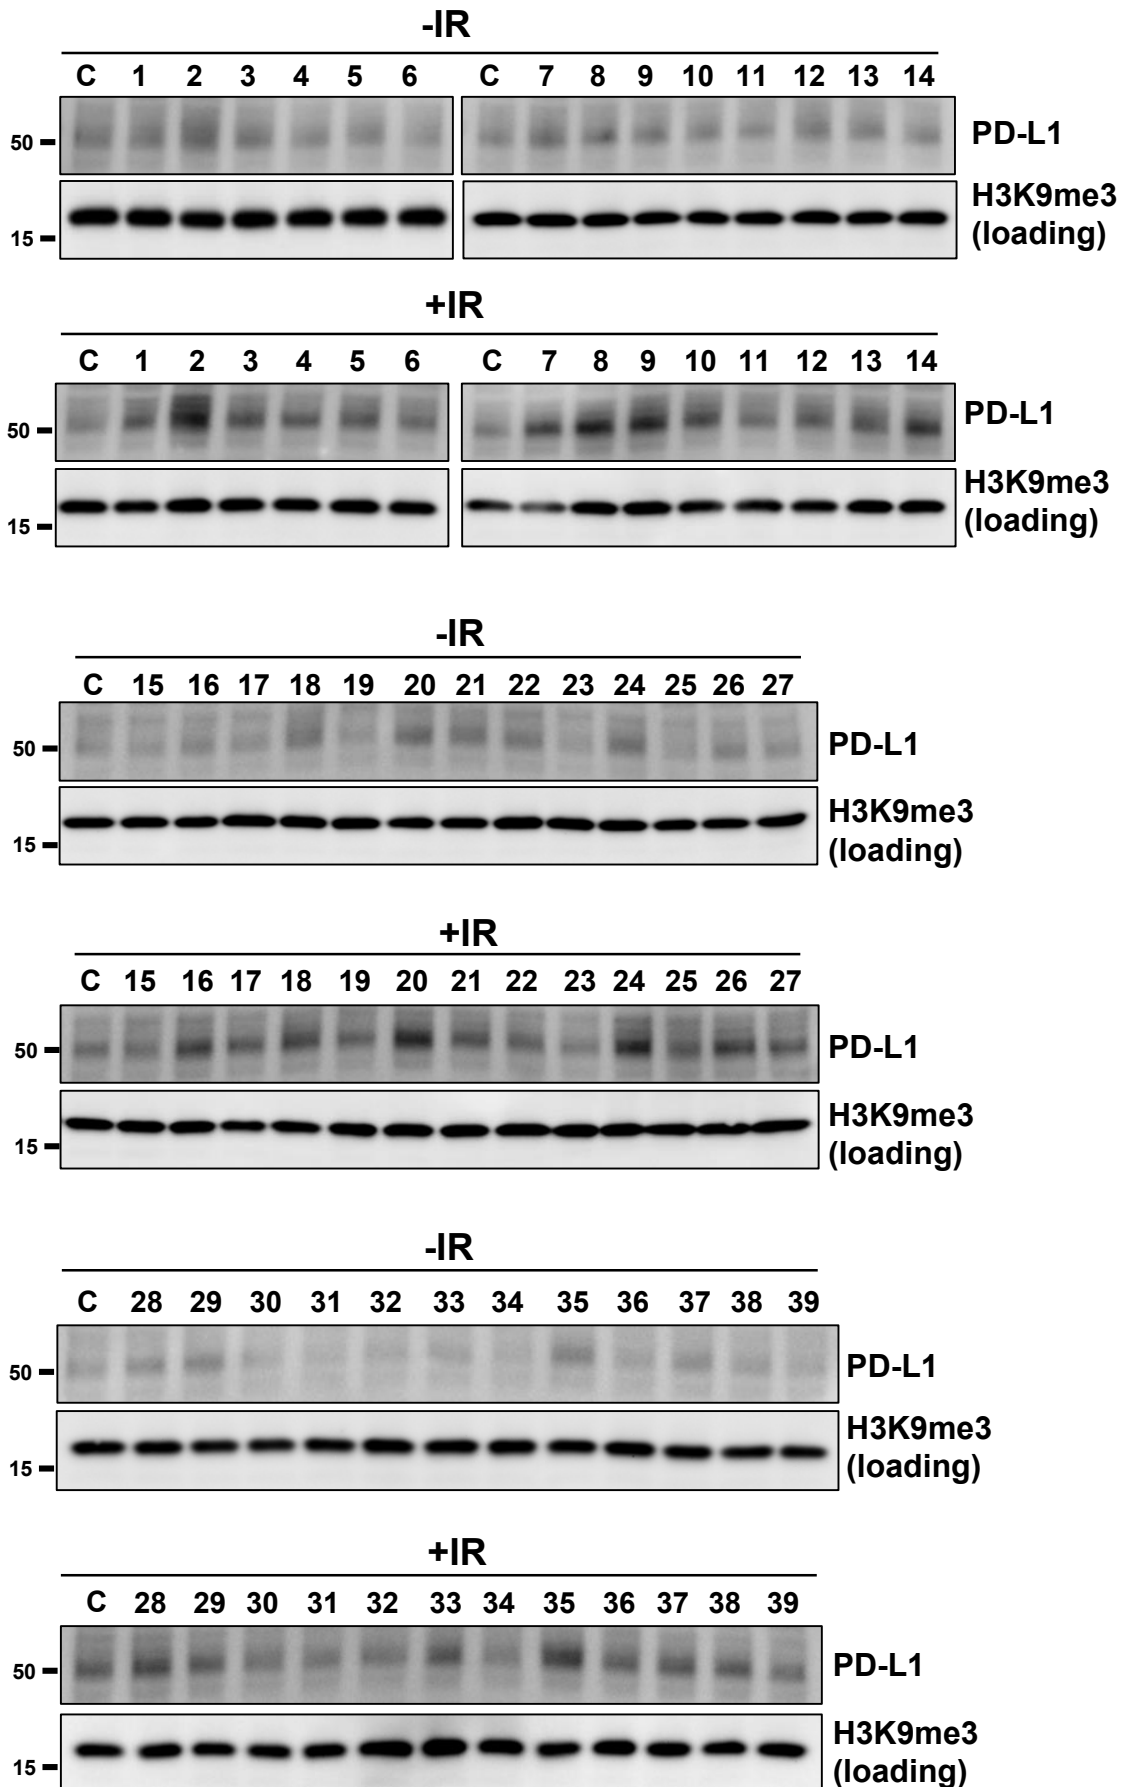

# Supplementary Figure 5

| <b>NHEJ</b> | <b>HR</b>   |             |
|-------------|-------------|-------------|
| 1. DNA-PK   | 7. BRCA1    | 28. XRCC2   |
| 2. Ku80     | 8. BRCA2    | 29. XRCC3   |
| 3. XLF      | 9. PALB2    | 30. SMC1A   |
| 4. LIG4     | 10. BRCC3   | 31. SMC3    |
| 5. PAXX     | 11. RAP80   | 32. SMC5    |
| 6. XRCC4    | 12. RBBP8   | 33. SMC6    |
|             | 13. BARD1   | 34. Artemis |
|             | 14. ABRA1   | 35. DNA2    |
|             | 15. RAD1    | 36. EXO1    |
|             | 16. RAD10   | 37. EXD2    |
|             | 17. RAD18   | 38. MUS81   |
|             | 18. RAD21   | 39. GEN1    |
|             | 19. RAD23A  |             |
|             | 20. RAD23B  |             |
|             | 21. RAD51   |             |
|             | 22. RAD51C  |             |
|             | 23. RAD51L1 |             |
|             | 24. RAD51L3 |             |
|             | 25. RAD52   |             |
|             | 26. RAD54B  |             |
|             | 27. RAD54L  |             |

## **Supplementary Figure 5. Analysis of PD-L1 expression with or without IR following siRNA library of DSB repair genes**

U2OS cells exposed to siRNA (ON-TARGETplus siRNA) were harvested 48 h after irradiation at 10 Gy. PD-L1 expression was examined by immunoblotting. The signal intensity of PD-L1 and H3K9me3 was quantified by ImageJ 1.48v. After normalisation of the PD-L1 signal using the loading control H3K9me3, the relative PD-L1 signal for each siRNA compared with that of siControl was determined, as shown in Fig. 3a, b.

# Supplementary Figure 6

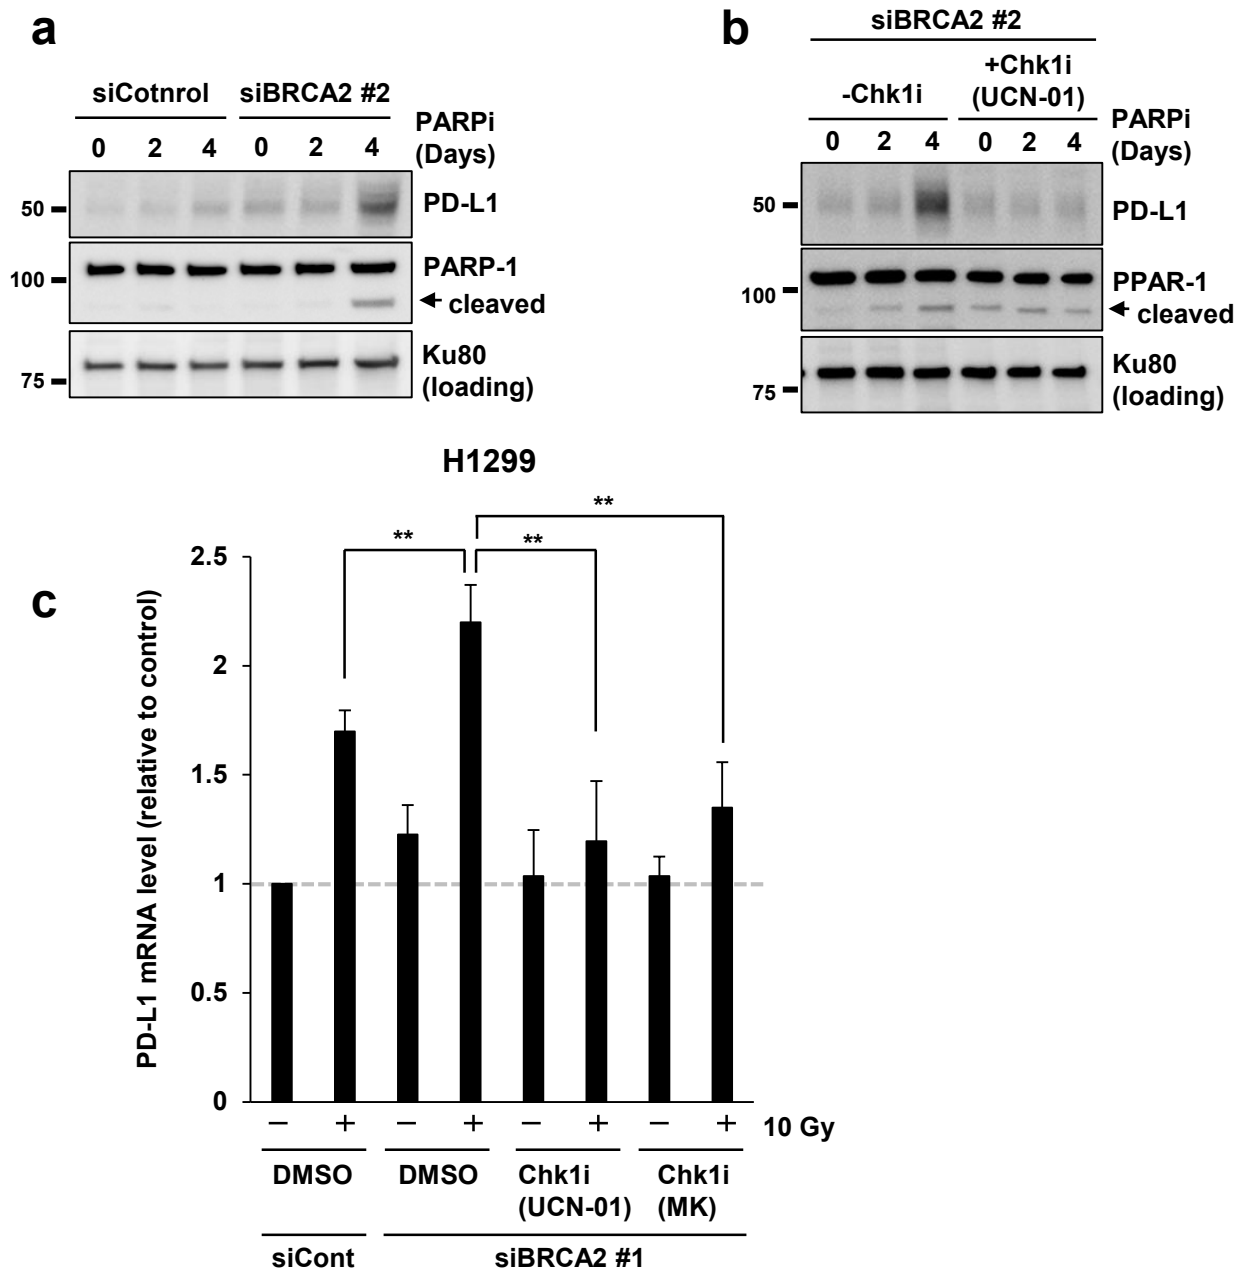

## Supplementary Figure 6. Depletion of BRCA2 increases the upregulation of PD-L1 in response to IR or PARP inhibition

a) Similar to the data obtained by siBRCA2 #1 (Fig. 4b), depletion of BRCA2 by siBRCA2 #2 upregulates PD-L1 expression following the treatment with PARP inhibitor (PARPi). The knockdown efficiency of siBRCA2 #2 is shown in Fig. 4a.

b) The upregulation of PD-L1 in cells treated with siBRCA2 #2 + PARPi was suppressed by Chk1 inhibition.

c) Depletion of BRCA2 by siBRCA2 upregulates PD-L1 mRNA expression in H1299 cells after IR. The enhancement of PD-L1 mRNA was suppressed by Chk1 inhibition. Cells were harvested 48 h after IR, and PD-L1 mRNA was measured by pPCR.

Error bars represent the s.d. of three independent experiments (c).

# Supplementary Figure 7

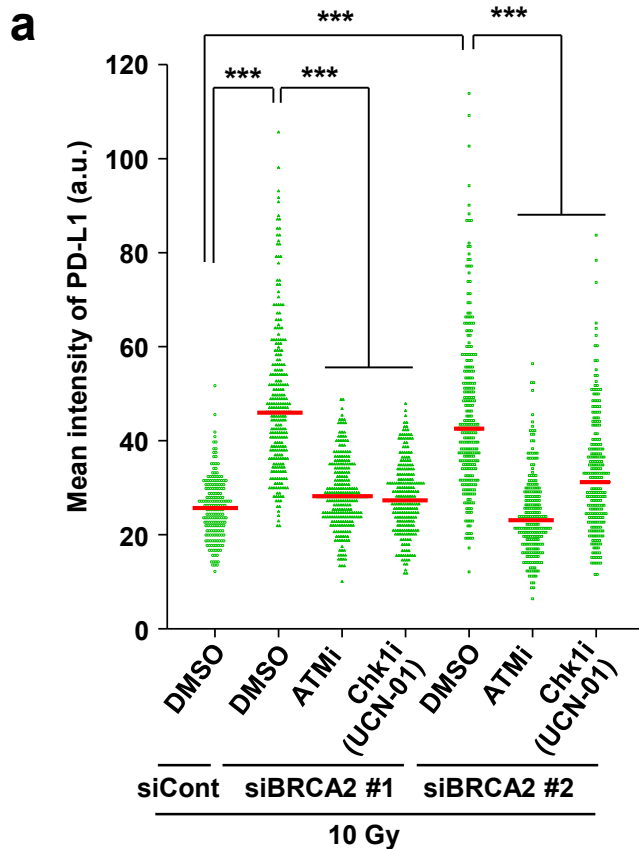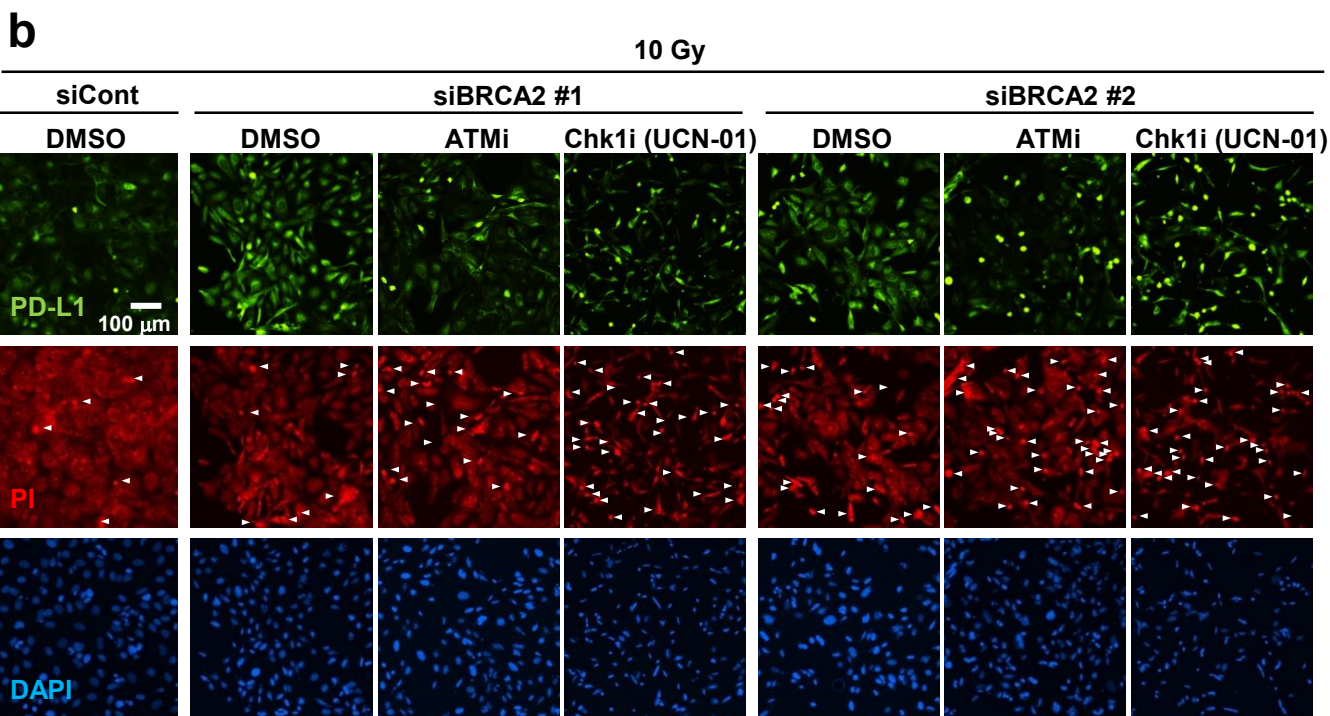

**Supplementary Figure 7. Upregulation of cell-surface PD-L1 in BRCA2-depleted cells requires ATM/Chk1 activity**

a) Cell-surface PD-L1 in BRCA2-depleted U2OS cells was examined by immunofluorescence without permeabilisation. Dead cells identified by PI were excluded from the analysis.

b) A representative image of panel a is shown.

# Supplementary Figure 8

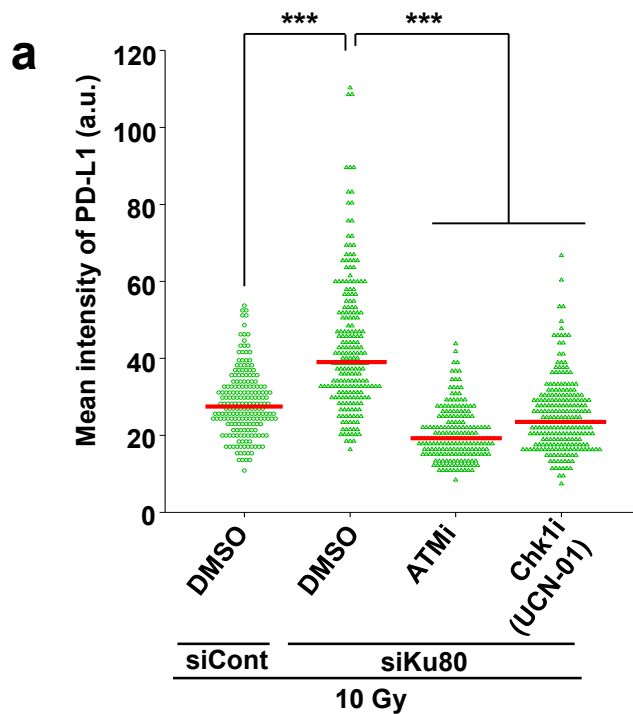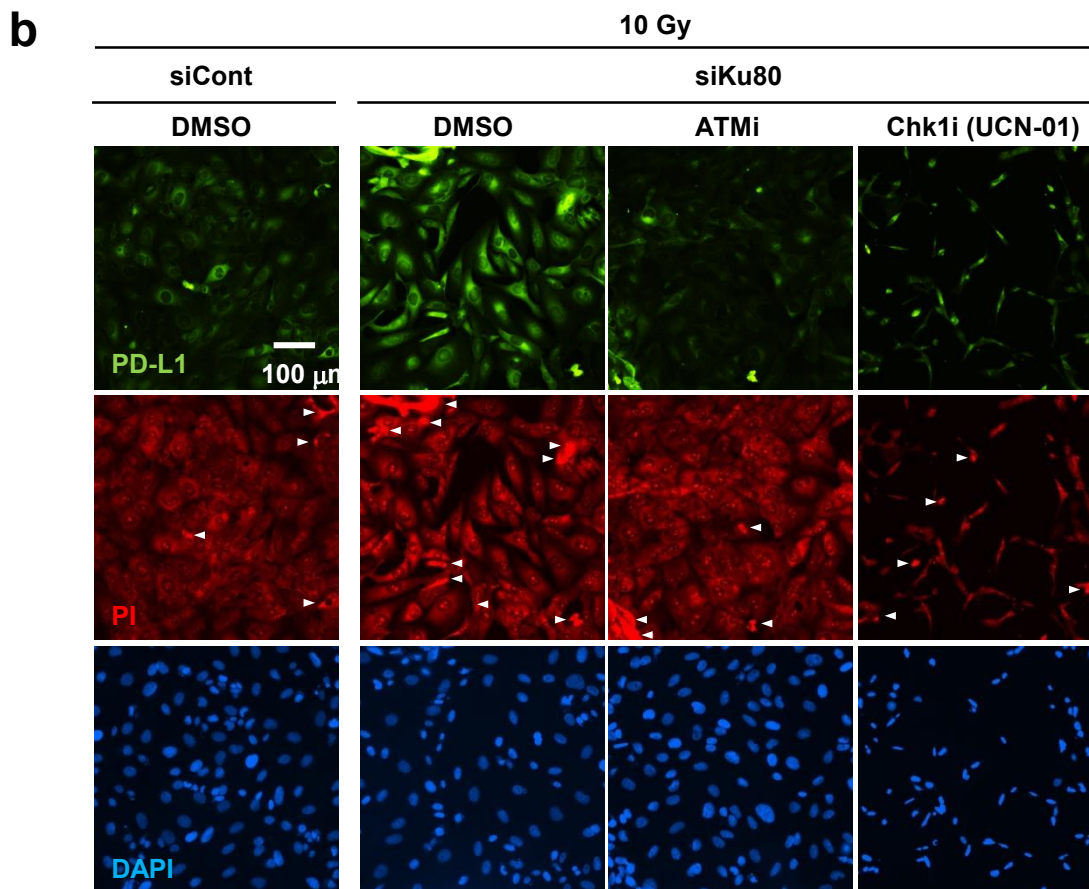

**Supplementary Figure 8. Upregulation of cell-surface PD-L1 in Ku80-depleted cells requires ATM/Chk1 activity**

a) Cell-surface PD-L1 in Ku80-depleted U2OS cells was examined by immunofluorescence without permeabilisation. Dead cells identified by PI were excluded from the analysis.

b) A representative image of panel a is shown.

# Supplementary Figure 9

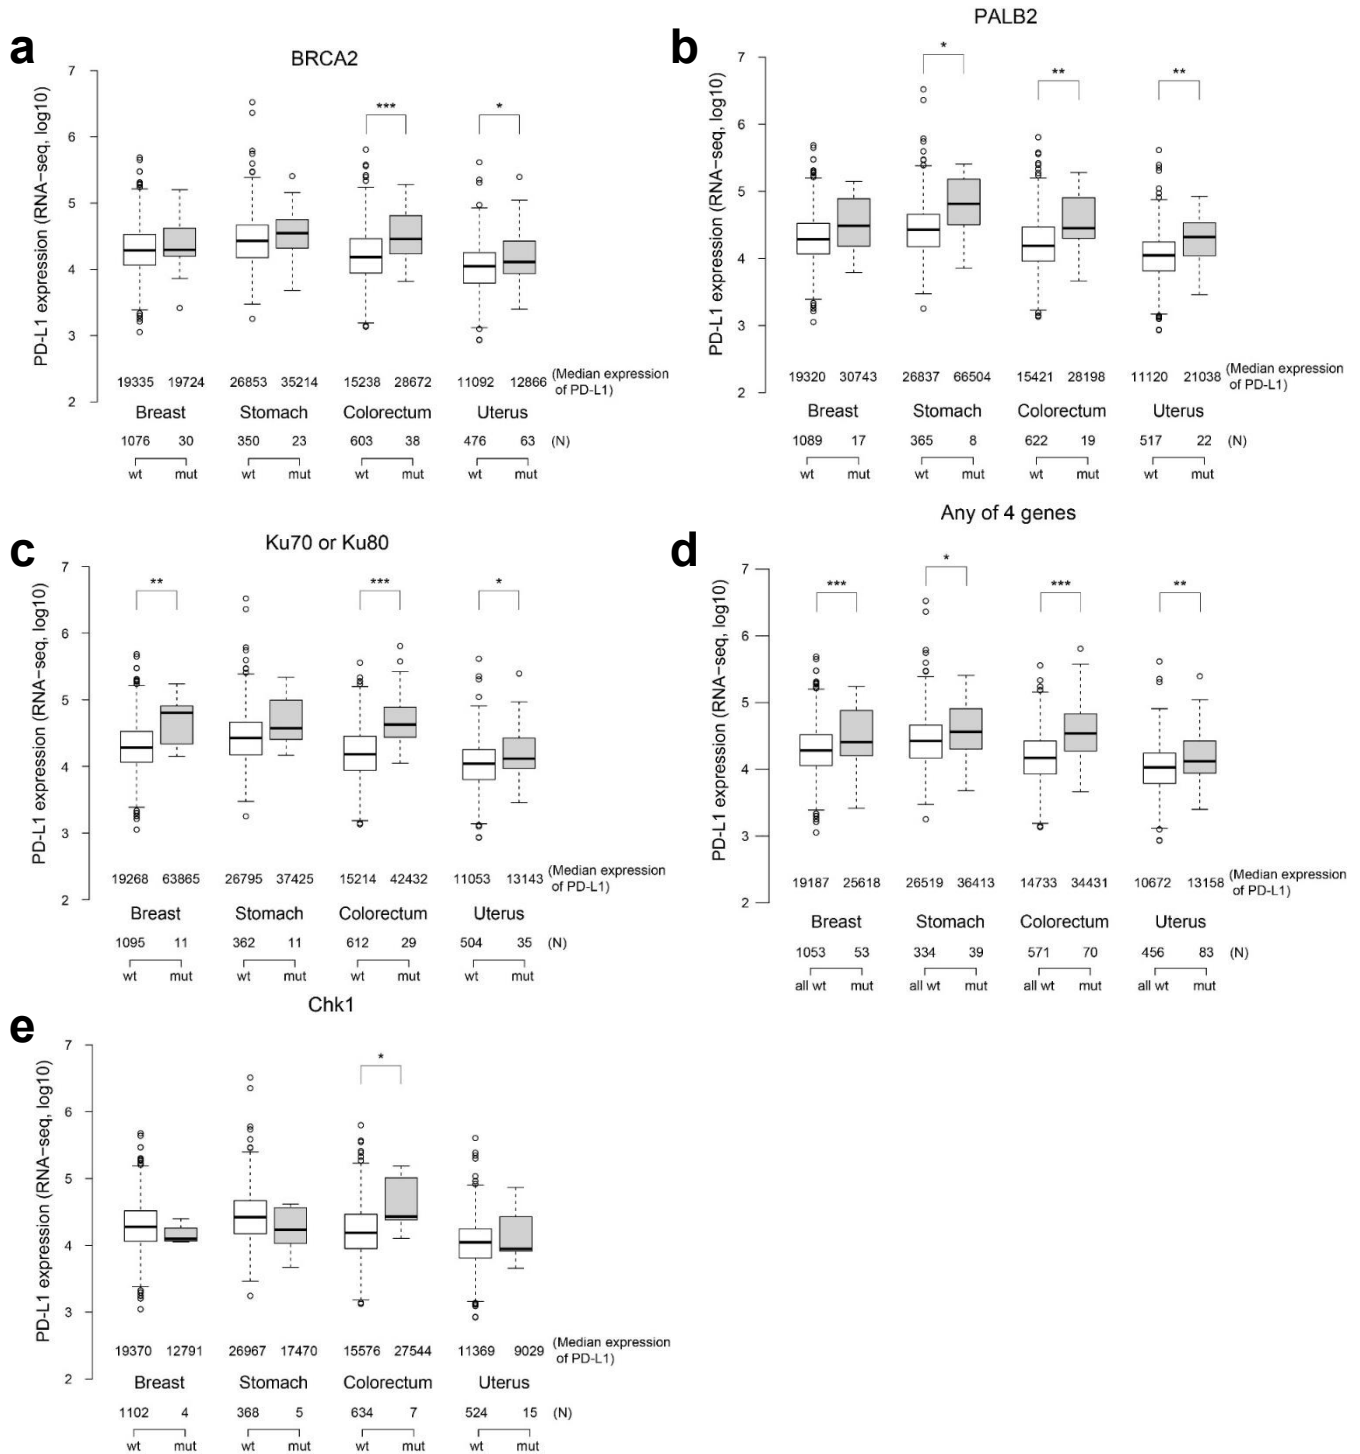

## Supplementary Figure 9. Higher PD-L1 expression in tumours is associated with BRCA2, PALB2 and Ku70/80 mutations

a–c) PD-L1 expression levels in neoplastic breast, stomach, colorectal and uterine samples are shown regarding the mutation status in BRCA2 (a), PALB2 (b) and Ku70/80 (c). Analyses of other tumours are summarised in Extended Data Table 3.

d) Significant increases in PD-L1 expression in neoplastic breast, stomach, colorectal and uterine samples are observed in association with mutations in any of the four genes.

e) PD-L1 expression levels in neoplastic breast, stomach, colorectal and uterine samples are shown regarding the mutation status in Chk1.

# Supplementary Figure 10

p53

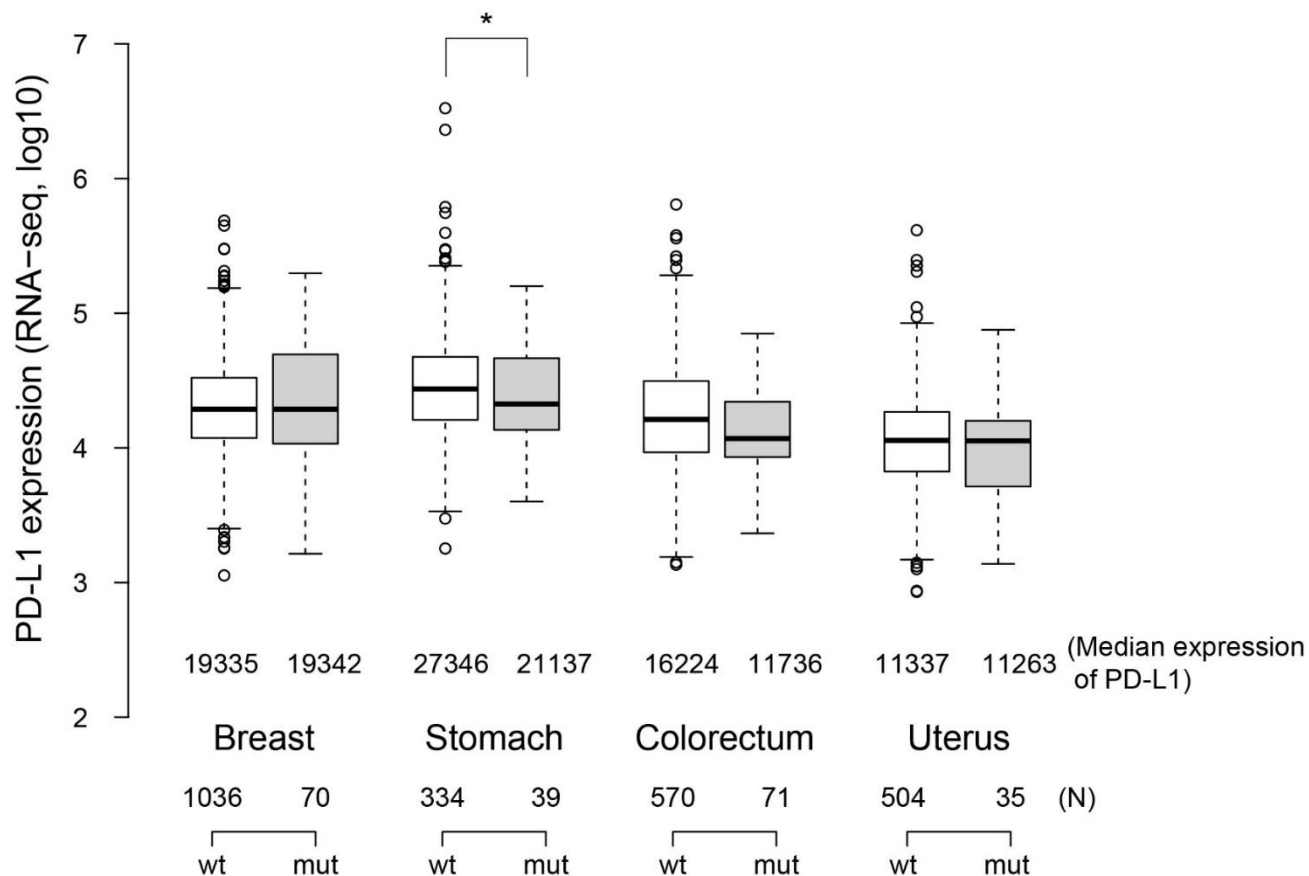

## Supplementary Figure 10. PD-L1 expression in tumours is not associated with p53 mutation

There is not an obvious correlation between PD-L1 expression and p53 mutation. In stomach samples, p53 mutant shows a minor reduction of PD-L1 expression ( $P < 0.05$ ).

# Supplementary Figure 11

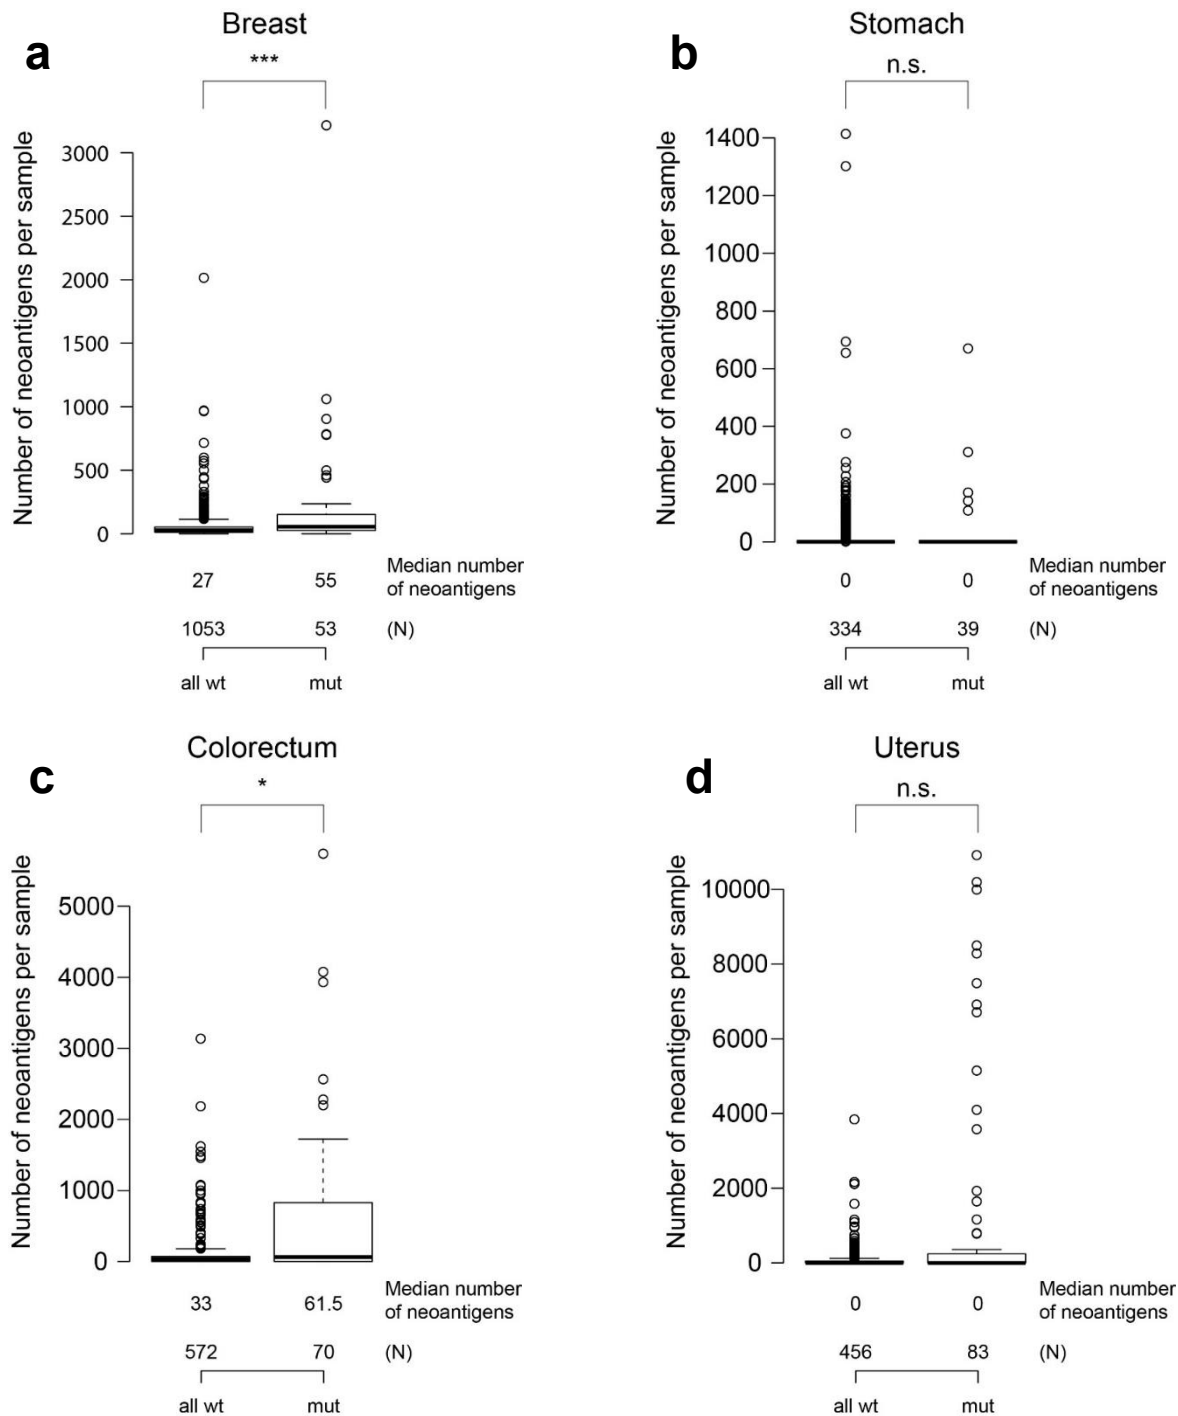

## Supplementary Figure 11. Analysis of neoantigen levels in tumours harbouring mutation in DNA repair genes

a–d) The levels of neoantigens in neoplastic breast (a), stomach (b), colorectum (c) and uterus (d) samples are shown regarding the mutation status in any of the four genes, BRCA2, PALB2 and Ku70/80. While neoplastic breast and colorectal samples harbouring mutations in any of the four genes exhibit an increase in neoantigen levels, statistical significant difference was not observed in stomach and uterine samples.



# Supplementary Figure 12

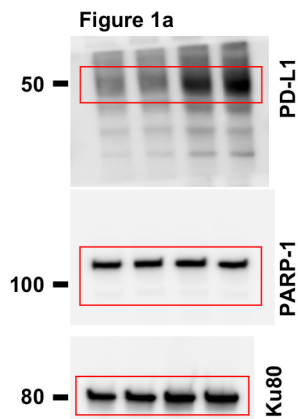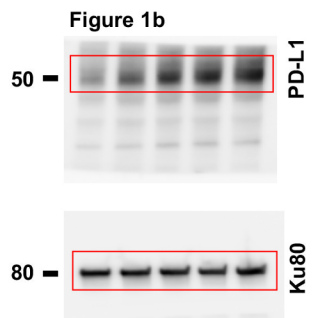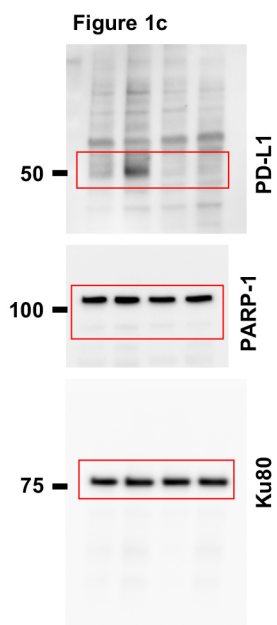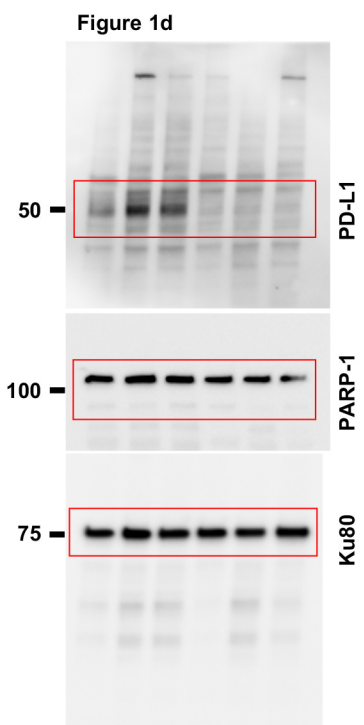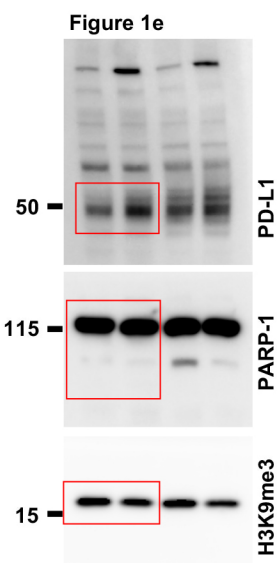

**Figure 2a**

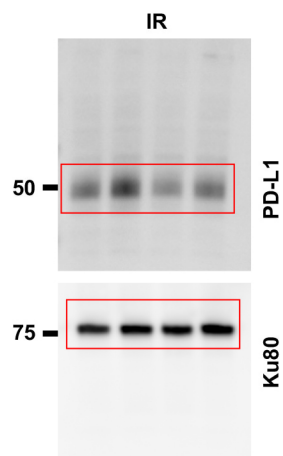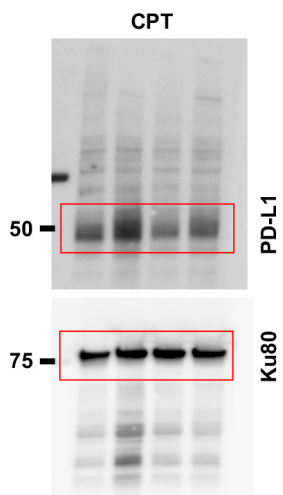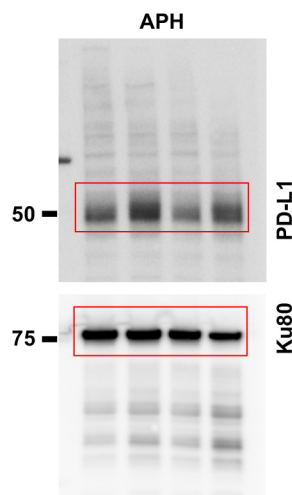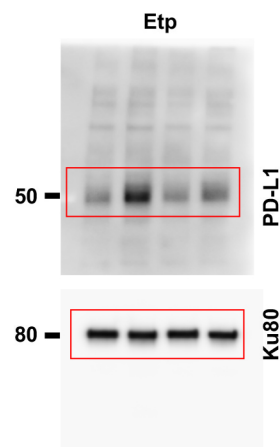

Figure 2b

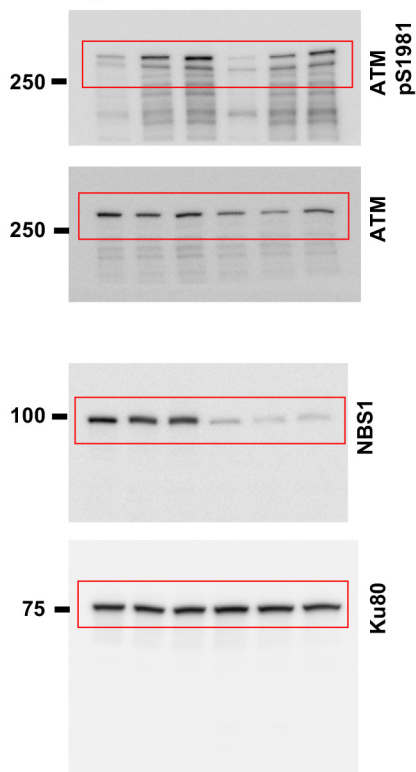

Figure 2d

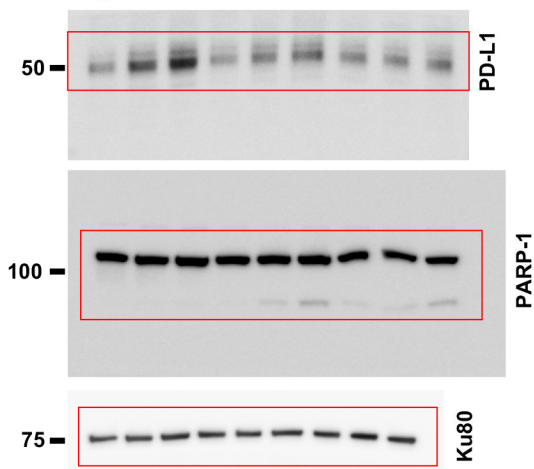

Figure 2e

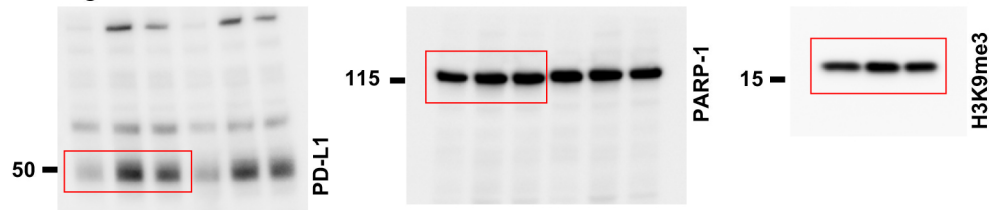

Figure 4a

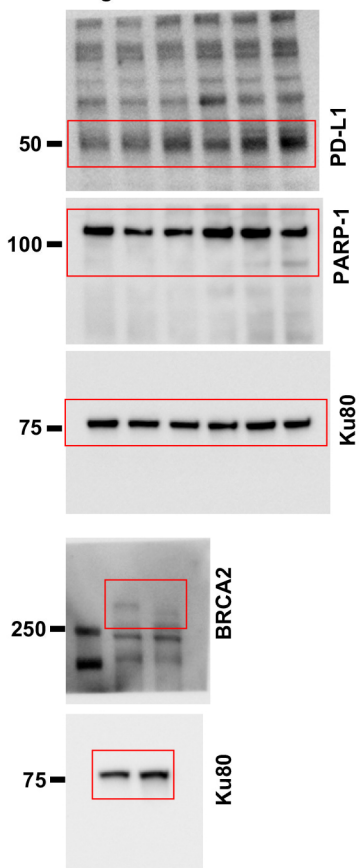

Figure 4b

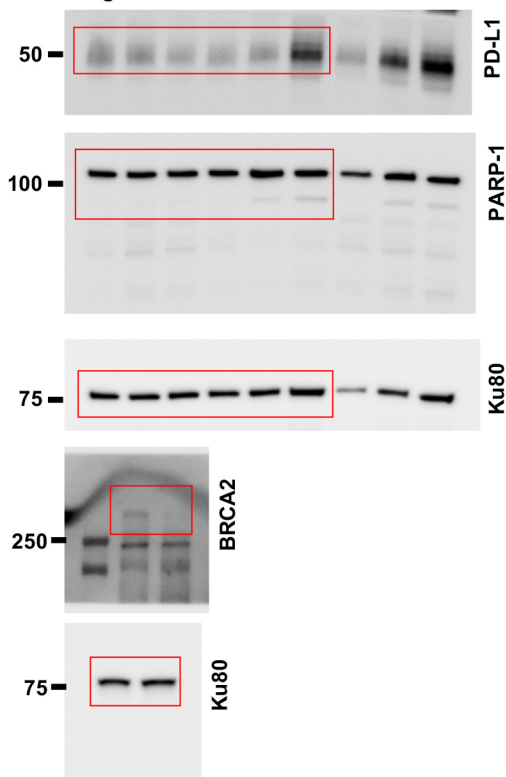

Figure 4c

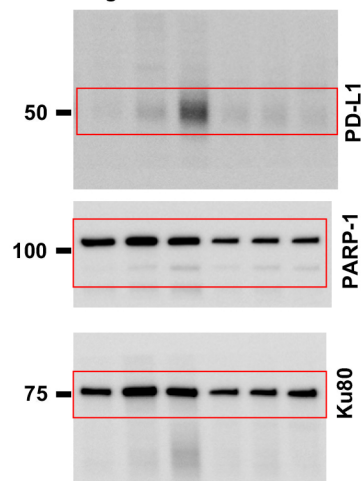

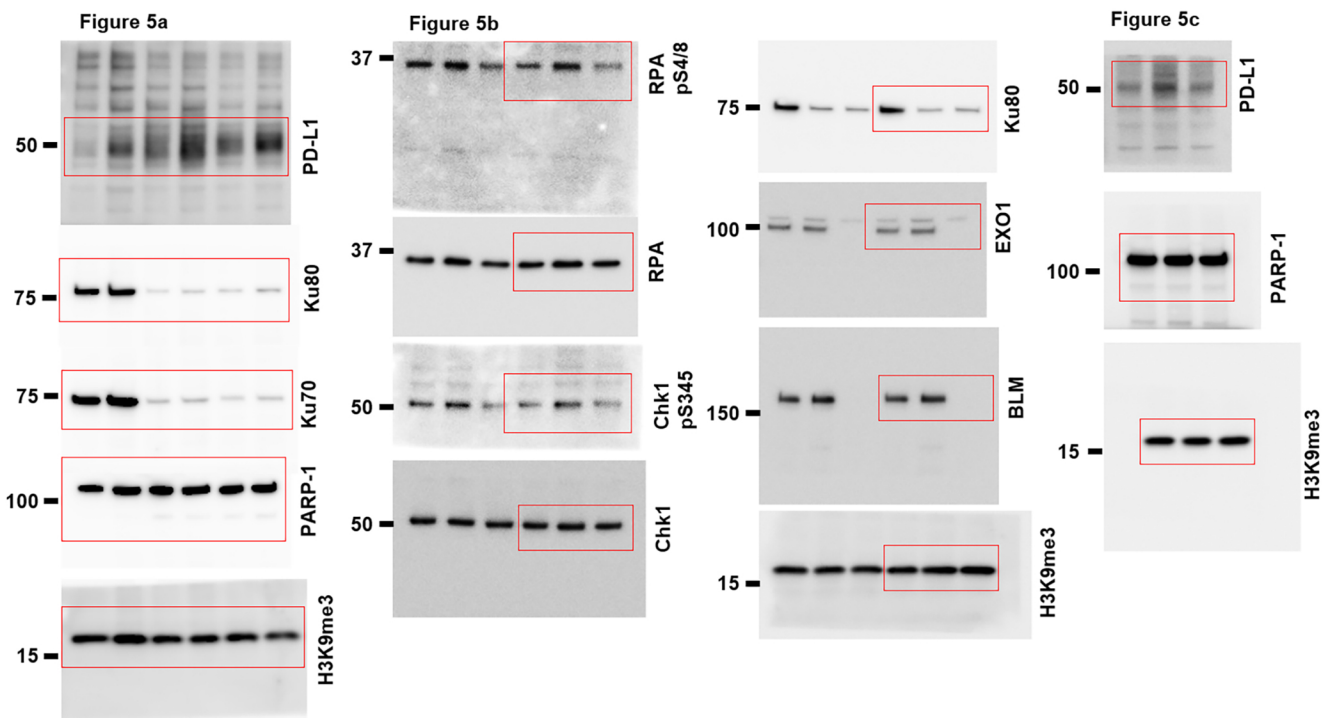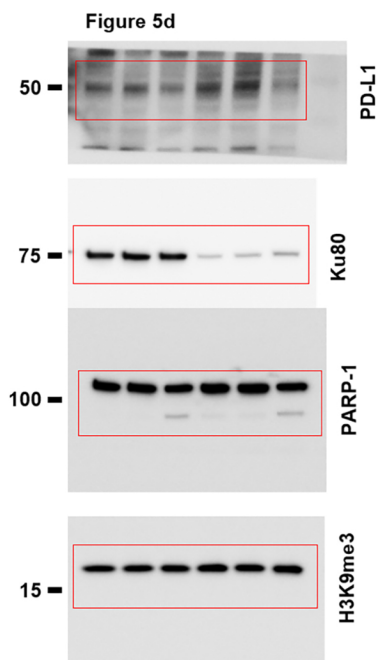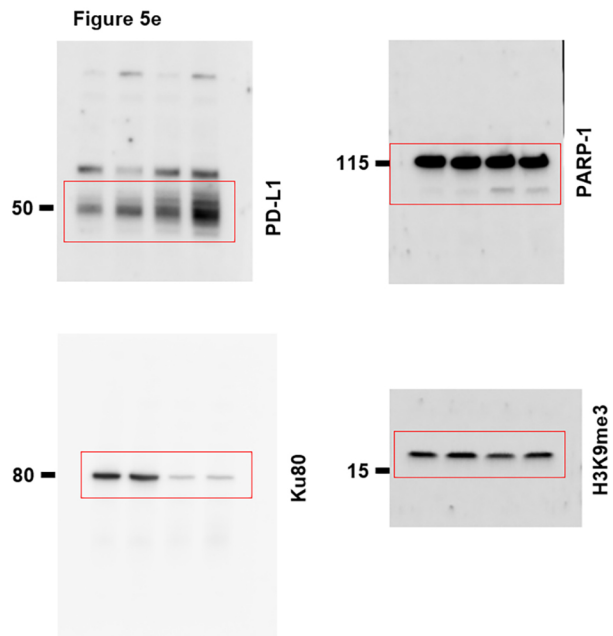

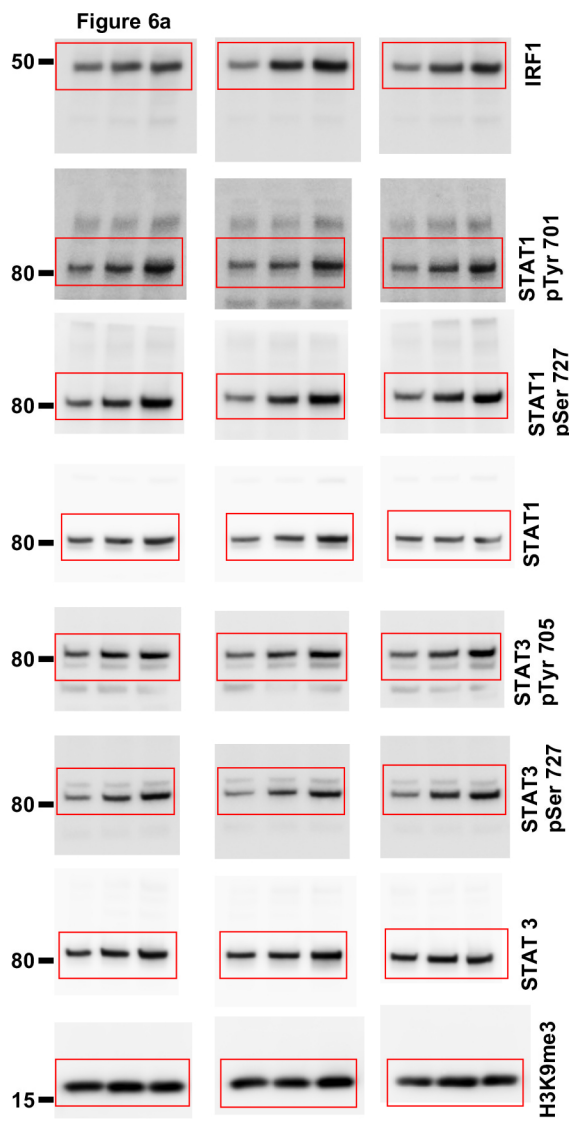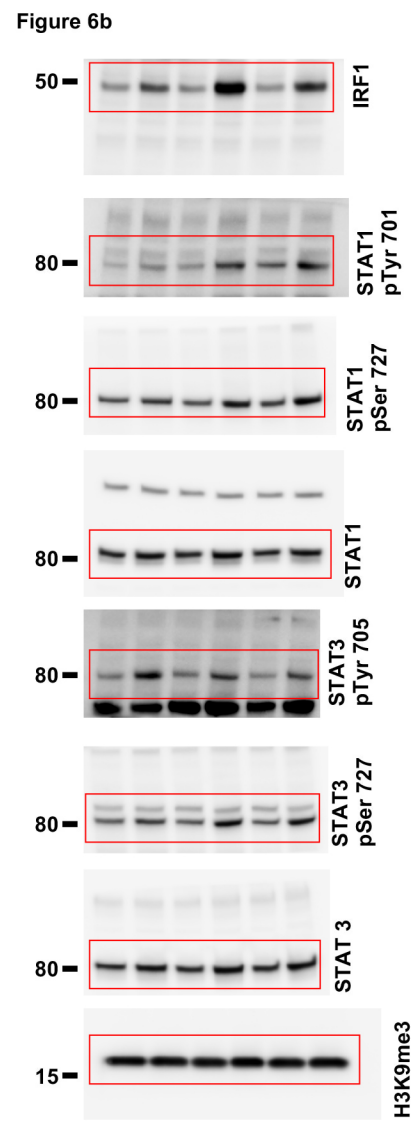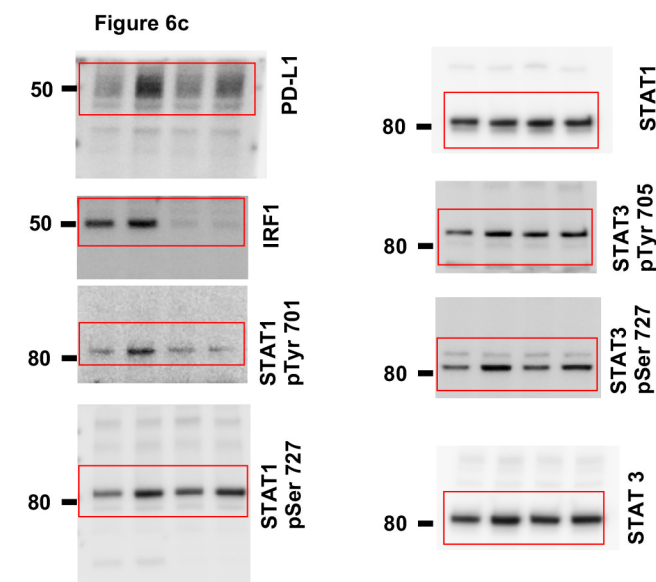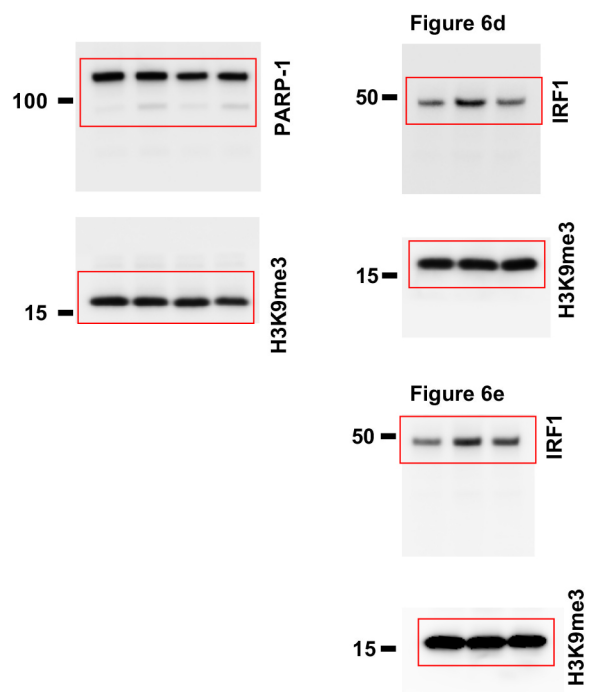

**Supplementary Figure 12. Uncropped blots presented in the main text.**

**Supplementary Table 1. Summary of TCGA data set analysis**

| TCGA study       | PD-L1 wt case N | Gene    | Status | N     | Median expression of PD-L1 | PD-L1 expression ratio (mut/wt) | Mann-Whitney U test p-value | Significance |
|------------------|-----------------|---------|--------|-------|----------------------------|---------------------------------|-----------------------------|--------------|
| <b>BRCA</b>      | 1106            | BRCA2   | wt     | 1076  | 19335                      | 1.02                            | 0.2618                      |              |
|                  |                 |         | mut    | 30    | 19724                      |                                 |                             |              |
|                  |                 | PALB2   | wt     | 1089  | 19320                      | 1.59                            | 0.09590                     |              |
|                  |                 |         | mut    | 17    | 30743                      |                                 |                             |              |
|                  |                 | Ku70/80 | wt     | 1095  | 19268                      | 3.31                            | 0.002563                    | **           |
|                  |                 |         | mut    | 11    | 63865                      |                                 |                             |              |
|                  | Any             | wt      | 1053   | 19187 | 1.34                       | 0.0007147                       | ***                         |              |
|                  |                 | mut     | 53     | 25618 |                            |                                 |                             |              |
| <b>CESC</b>      | 304             | BRCA2   | wt     | 296   | 55351                      | 0.46                            | 0.1384                      |              |
|                  |                 |         | mut    | 8     | 25231                      |                                 |                             |              |
|                  |                 | PALB2   | wt     | 296   | 52442                      | 0.98                            | 0.9205                      |              |
|                  |                 |         | mut    | 8     | 51256                      |                                 |                             |              |
|                  |                 | Ku70/80 | wt     | 298   | 52442                      | 1.80                            | 0.3919                      |              |
|                  |                 |         | mut    | 6     | 94452                      |                                 |                             |              |
|                  | Any             | wt      | 284    | 54043 | 0.59                       | 0.9612                          |                             |              |
|                  |                 | mut     | 20     | 32108 |                            |                                 |                             |              |
| <b>COAD+READ</b> | 642             | BRCA2   | wt     | 604   | 15238                      | 1.88                            | 1.869E-05                   | ***          |
|                  |                 |         | mut    | 38    | 28672                      |                                 |                             |              |
|                  |                 | PALB2   | wt     | 623   | 15421                      | 1.83                            | 0.001342                    | **           |
|                  |                 |         | mut    | 19    | 28198                      |                                 |                             |              |
|                  |                 | Ku70/80 | wt     | 613   | 15214                      | 2.79                            | 3.603E-08                   | ***          |
|                  |                 |         | mut    | 29    | 42432                      |                                 |                             |              |
|                  | Any             | wt      | 572    | 14733 | 2.33                       | 1.454E-11                       | ***                         |              |
|                  |                 | mut     | 70     | 34431 |                            |                                 |                             |              |
| <b>HNSC</b>      | 501             | BRCA2   | wt     | 482   | 59770                      | 0.57                            | 0.1887                      |              |
|                  |                 |         | mut    | 19    | 34242                      |                                 |                             |              |
|                  |                 | PALB2   | wt     | 494   | 59412                      | 0.57                            | 0.7734                      |              |
|                  |                 |         | mut    | 7     | 33595                      |                                 |                             |              |
|                  |                 | Ku70/80 | wt     | 492   | 59294                      | 1.09                            | 0.9343                      |              |
|                  |                 |         | mut    | 9     | 64814                      |                                 |                             |              |
|                  | Any             | wt      | 466    | 59769 | 0.62                       | 0.2454                          |                             |              |
|                  |                 | mut     | 35     | 37270 |                            |                                 |                             |              |
| <b>LUAD</b>      | 533             | BRCA2   | wt     | 506   | 52891                      | 0.80                            | 0.5479                      |              |
|                  |                 |         | mut    | 27    | 42378                      |                                 |                             |              |
|                  |                 | PALB2   | wt     | 516   | 51872                      | 1.52                            | 0.09425                     |              |
|                  |                 |         | mut    | 17    | 78943                      |                                 |                             |              |
|                  |                 | Ku70/80 | wt     | 513   | 52803                      | 0.61                            | 0.1238                      |              |
|                  |                 |         | mut    | 20    | 32174                      |                                 |                             |              |
|                  | Any             | wt      | 471    | 52817 | 0.86                       | 0.5363                          |                             |              |
|                  |                 | mut     | 62     | 45194 |                            |                                 |                             |              |
| <b>LUSC</b>      | 500             | BRCA2   | wt     | 470   | 62157                      | 0.80                            | 0.7539                      |              |
|                  |                 |         | mut    | 30    | 49652                      |                                 |                             |              |
|                  |                 | PALB2   | wt     | 487   | 62592                      | 0.61                            | 0.1551                      |              |
|                  |                 |         | mut    | 13    | 38180                      |                                 |                             |              |
|                  |                 | Ku70/80 | wt     | 488   | 60710                      | 2.33                            | 0.05611                     |              |
|                  |                 |         | mut    | 12    | 141261                     |                                 |                             |              |
|                  | Any             | wt      | 449    | 61849 | 0.95                       | 0.5207                          |                             |              |
|                  |                 | mut     | 51     | 58494 |                            |                                 |                             |              |

**Supplementary Table 1 (continued)**

| TCGA study  | PD-L1 wt case N | Gene    | Status | N   | Median expression of PD-L1 | PD-L1 expression ratio (mut/wt) | Mann-Whitney U test p-value | Significance |
|-------------|-----------------|---------|--------|-----|----------------------------|---------------------------------|-----------------------------|--------------|
| <b>SKCM</b> | 458             | BRCA2   | wt     | 422 | 24744                      | 0.83                            | 0.4308                      |              |
|             |                 |         | mut    | 36  | 20642                      |                                 |                             |              |
|             |                 | PALB2   | wt     | 443 | 23497                      | 1.56                            | 0.1561                      |              |
|             |                 |         | mut    | 15  | 36669                      |                                 |                             |              |
|             |                 | Ku70/80 | wt     | 437 | 24725                      | 0.76                            | 0.5457                      |              |
|             |                 |         | mut    | 21  | 18852                      |                                 |                             |              |
|             |                 | Any     | wt     | 394 | 24706                      | 0.92                            | 0.8975                      |              |
|             |                 |         | mut    | 64  | 22695                      |                                 |                             |              |
| <b>STAD</b> | 373             | BRCA2   | wt     | 350 | 26853                      | 1.31                            | 0.3344                      |              |
|             |                 |         | mut    | 23  | 35214                      |                                 |                             |              |
|             |                 | PALB2   | wt     | 365 | 26837                      | 2.48                            | 0.03211                     | *            |
|             |                 |         | mut    | 8   | 66504                      |                                 |                             |              |
|             |                 | Ku70/80 | wt     | 362 | 26795                      | 1.40                            | 0.09538                     |              |
|             |                 |         | mut    | 11  | 37425                      |                                 |                             |              |
|             |                 | Any     | wt     | 334 | 26519                      | 1.37                            | 0.04789                     | *            |
|             |                 |         | mut    | 39  | 36413                      |                                 |                             |              |
| <b>UCEC</b> | 539             | BRCA2   | wt     | 476 | 11092                      | 1.16                            | 0.04036                     | *            |
|             |                 |         | mut    | 63  | 12866                      |                                 |                             |              |
|             |                 | PALB2   | wt     | 517 | 11120                      | 1.89                            | 0.005539                    | **           |
|             |                 |         | mut    | 22  | 21038                      |                                 |                             |              |
|             |                 | Ku70/80 | wt     | 504 | 11053                      | 1.19                            | 0.02707                     | *            |
|             |                 |         | mut    | 35  | 13143                      |                                 |                             |              |
|             |                 | Any     | wt     | 456 | 10672                      | 1.23                            | 0.002054                    | **           |
|             |                 |         | mut    | 83  | 13158                      |                                 |                             |              |

BRCA: Breast invasive carcinoma

CESE: Cervical squamous cell carcinoma and endocervical adenocarcinoma

COAD+READ: Colon adenocarcinoma + Rectum adenocarcinoma

HNSC: Head and Neck squamous cell carcinoma

LUAD: Lung adenocarcinoma

LUSC: Lung squamous cell carcinoma

SKCM: Skin Cutaneous Melanoma

STAD: Stomach adenocarcinoma

UCEC: Uterine Corpus Endometrial Carcinoma

**Supplementary Table 2. List of siRNA used in this study**

| <b>Name</b>   | <b>Supplier</b> | <b>Sequence (sense 5'-3') or name of supplier</b> |
|---------------|-----------------|---------------------------------------------------|
| BLM           | Dharmacon       | ON-TARGETplus siRNA                               |
| BRCA2 #1      | Dharmacon       | ON-TARGETplus siRNA                               |
| BRCA2 #2      | SIGMA (custom)  | GAAGAAUGCAGGUUAAUAdTdT                            |
| Control       | SIGMA           | GGGAUACCUAGACGUUCUAdTdT                           |
| EXO1          | Dharmacon       | ON-TARGETplus siRNA                               |
| IRF1          | Dharmacon       | ON-TARGETplus siRNA                               |
| Ku70          | Dharmacon       | ON-TARGETplus siRNA                               |
| Ku80          | Dharmacon       | ON-TARGETplus siRNA                               |
| NBS1          | Dharmacon       | ON-TARGETplus siRNA                               |
| PD-L1         | Dharmacon       | ON-TARGETplus siRNA                               |
| siRNA library | Dharmacon       | ON-TARGETplus siRNA                               |

**Supplementary Table 3. List of antibodies and reagents used in this study**

| Target           | Mono/polyclonal | Clone/reference | Antibody raised in | Source                     | Dilution for I.B. | Dilution for I.F. |
|------------------|-----------------|-----------------|--------------------|----------------------------|-------------------|-------------------|
| ATM              | Mono            | D2E2            | Rabbit             | Cell Signaling Technology  | 1:1000            | -                 |
| ATM pS1981       | Mono            | EP1890Y         | Rabbit             | Abcam                      | 1:1000            | -                 |
| BLM              | Poly            | Ab2179          | Rabbit             | Abcam                      | 1:1000            | -                 |
| BRCA2            | Mono            | 2B              | Mouse              | Calbiochem                 | 1:100             | -                 |
| Chk1             | Mono            | 2G1D5           | Mouse              | Cell Signaling Technology  | 1:500             | -                 |
| Chk1 pS345       | Mono            | 133D3           | Rabbit             | Cell Signaling Technology  | 1:500             | -                 |
| EXO1             | Poly            | A302-640A       | Rabbit             | Bethyl Laboratories, Inc.  | 1:1000            | -                 |
| H3K9me3          | Poly            | Ab8898          | Rabbit             | Abcam                      | 1:4000            | -                 |
| HLA              | Mono            | EMR8-5          | Mouse              | Hokudo Co., Ltd            | 1:20000           | -                 |
| IRF1             | Mono            | D5E4            | Rabbit             | Cell Signaling Technology  | 1:1000            | -                 |
| Ku70             | Mono            | N3H10           | Mouse              | Abcam                      | 1:500             | -                 |
| Ku80             | Mono            | C48E7           | Rabbit             | Cell Signaling Technology  | 1:4000            | -                 |
| NBS1             | Poly            | PC269           | Rabbit             | Oncogene Research Products | 1:1000            | -                 |
| PARP-1           | Poly            | 9542            | Rabbit             | Cell Signaling Technology  | 1:1000            | -                 |
| PD-L1            | Mono            | E1L3N           | Rabbit             | Cell Signaling Technology  | 1:1000            | 1:200             |
| RPA32            | Mono            | LS-C38952       | Rat                | LifeSpan BioSciences, Inc. | 1:1000            | -                 |
| RPA32 pS4/S8     | Poly            | A300-245A       | Rabbit             | Bethyl Laboratories, Inc.  | 1:1000            | -                 |
| STAT1            | Mono            | D1K9Y           | Rabbit             | Cell Signaling Technology  | 1:1000            | -                 |
| STAT1 pTyr701    | Mono            | 58D6            | Rabbit             | Cell Signaling Technology  | 1:200             | -                 |
| STAT1 pSer727    | Mono            | D3B7            | Rabbit             | Cell Signaling Technology  | 1:1000            | -                 |
| STAT3            | Mono            | 79D7            | Rabbit             | Cell Signaling Technology  | 1:1000            | -                 |
| STAT3 pTyr705    | Mono            | D3A7            | Rabbit             | Cell Signaling Technology  | 1:1000            | -                 |
| STAT3 pSer727    | Mono            | 9134            | Rabbit             | Cell Signaling Technology  | 1:1000            | -                 |
| IFN gamma        | -               | 093-06111       | -                  | Wako                       | -                 | -                 |
| Propidium iodide | -               | PK-CA707-40017  | -                  | PromoKine                  | -                 | 1:2000            |

Minus signs indicate that the antibody was not used for this application in this study. I.B., immunoblotting; I.F., Immunofluorescence.

| Antibody information for FACS          | Source    |
|----------------------------------------|-----------|
| APC Mouse IgG2b, $\kappa$ Isotype Ctrl | Biologend |
| APC anti-human CD274 (B7-H1, PD-L1)    | Biologend |
